# Supplementary material
Source: Springer Nature journal article supplement (https://www.springermedizin.de/resource/supplementary/12955_2013_1258_MOESM3_ESM.pdf/9559178)

# Supplemental Figure 1. Structure Diagrams for the IBS-QOL Total Score Factor Models

## A. Original IBS-QOL Substructure

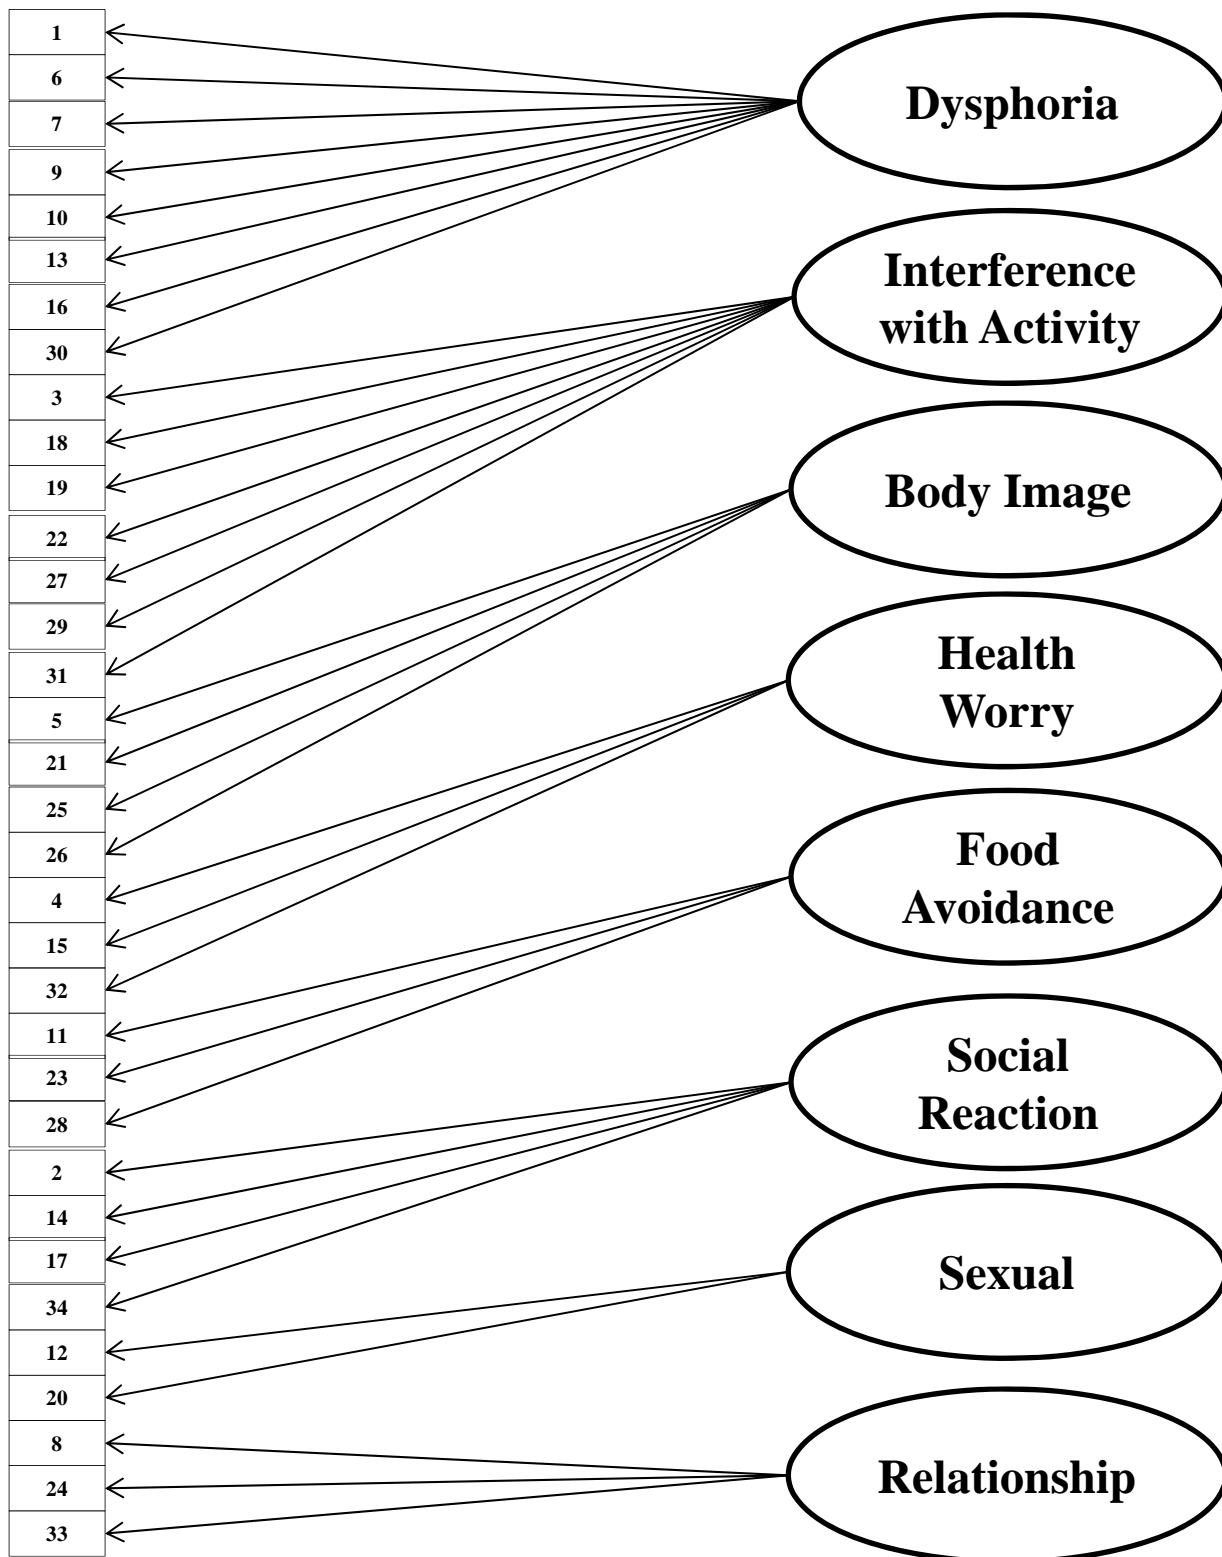

## B. Hierarchical IBS-QOL Substructure

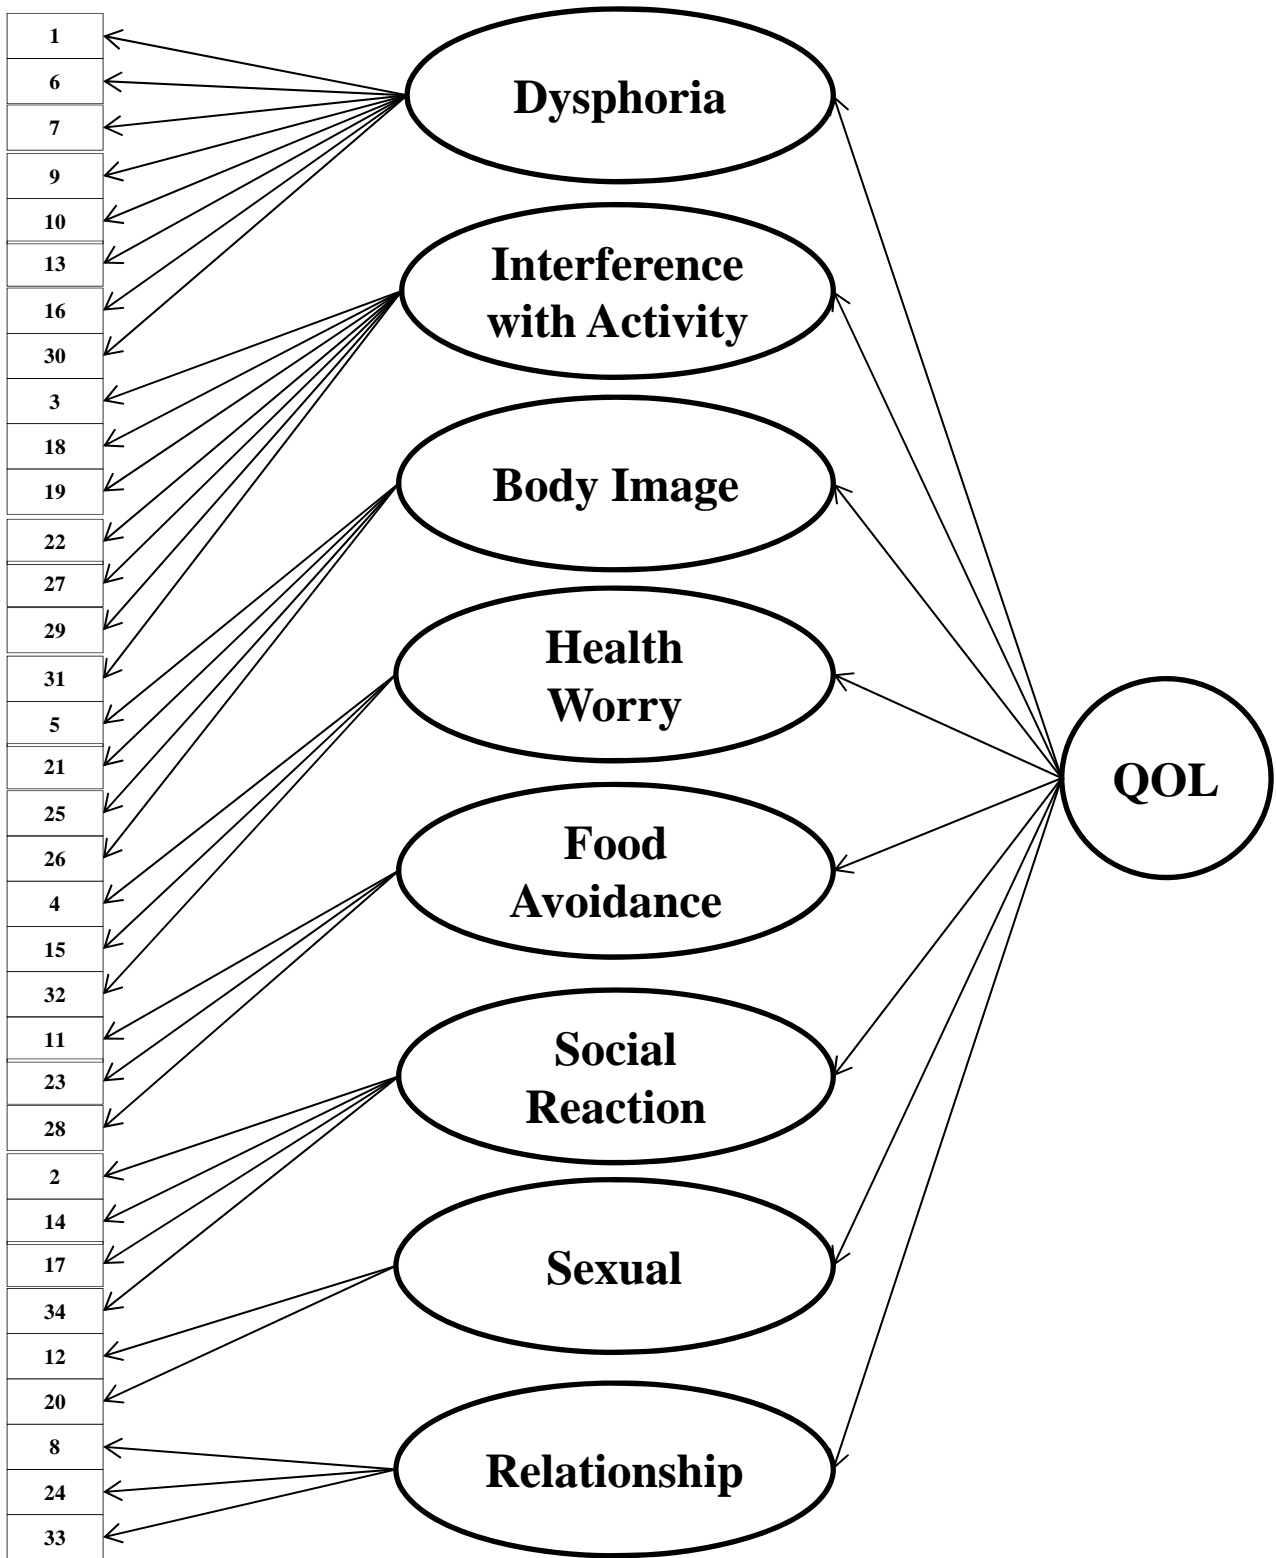

### C. Bifactor Structure

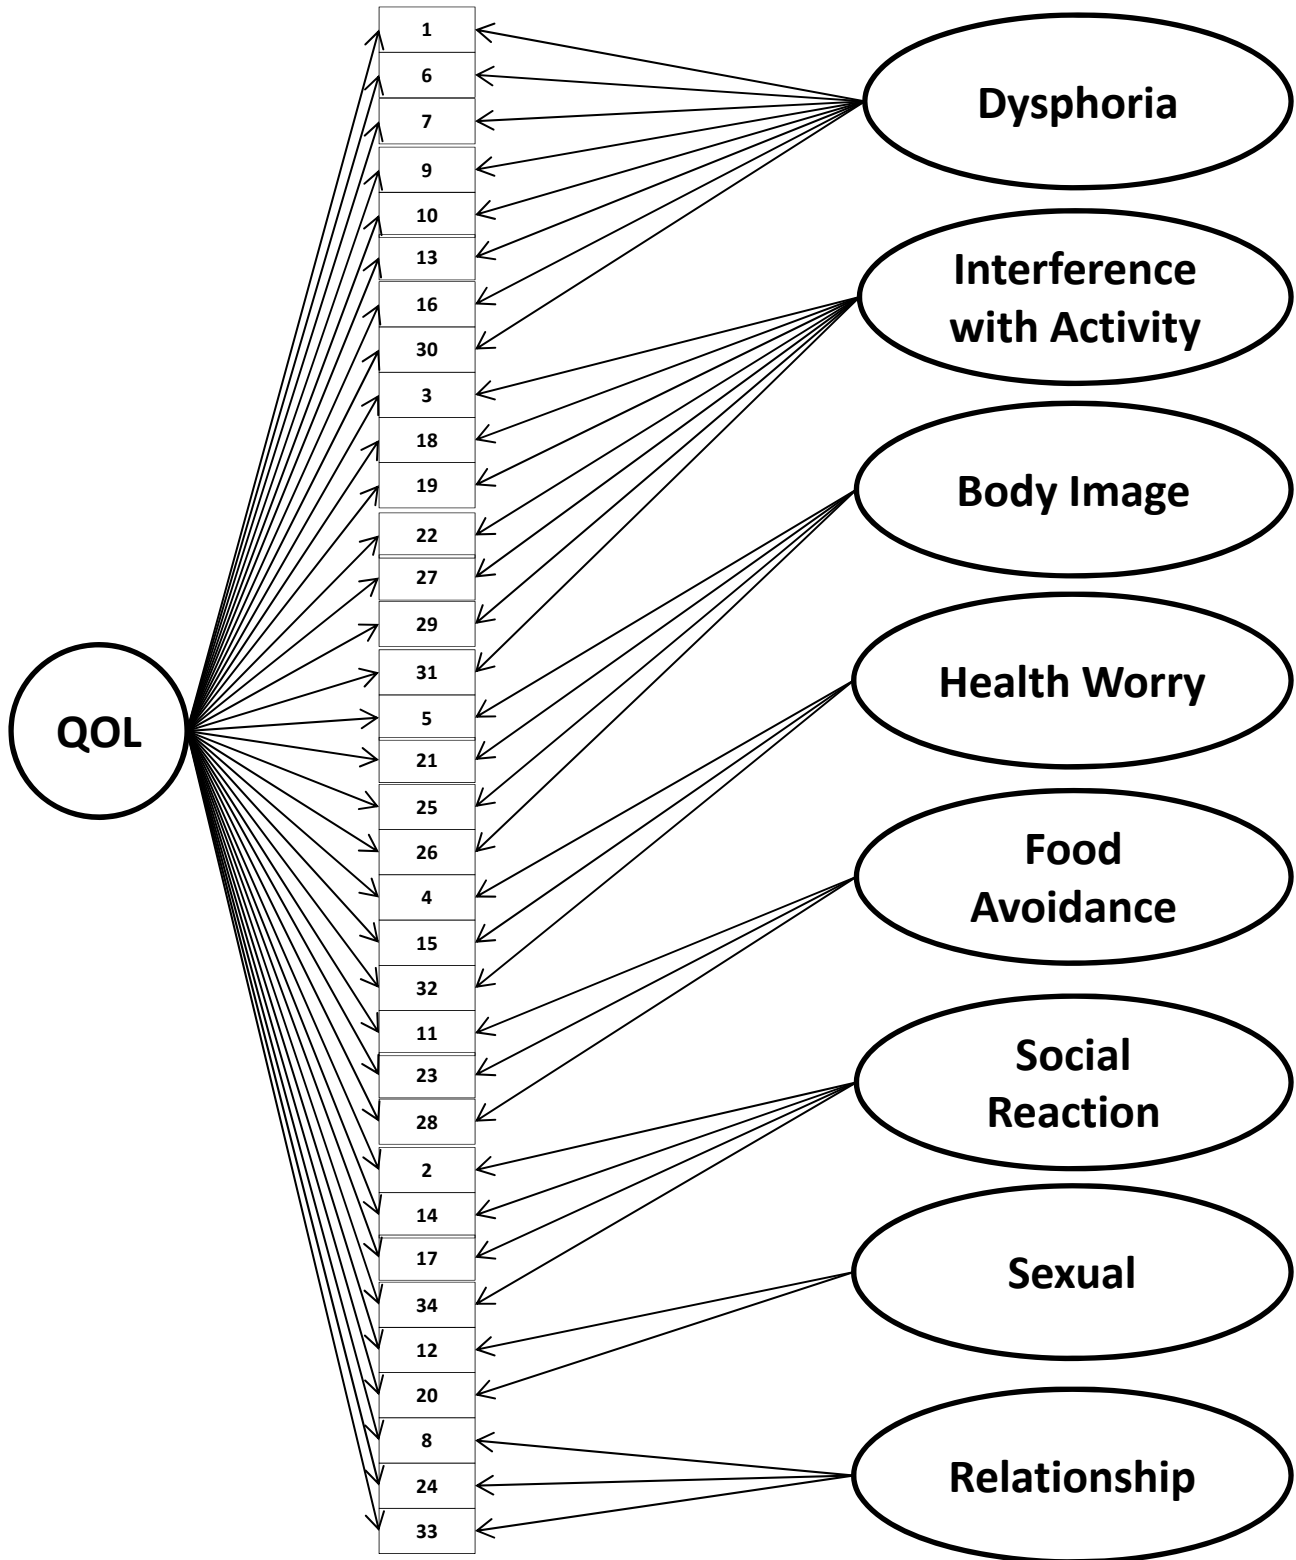

## D. Single Factor Structure

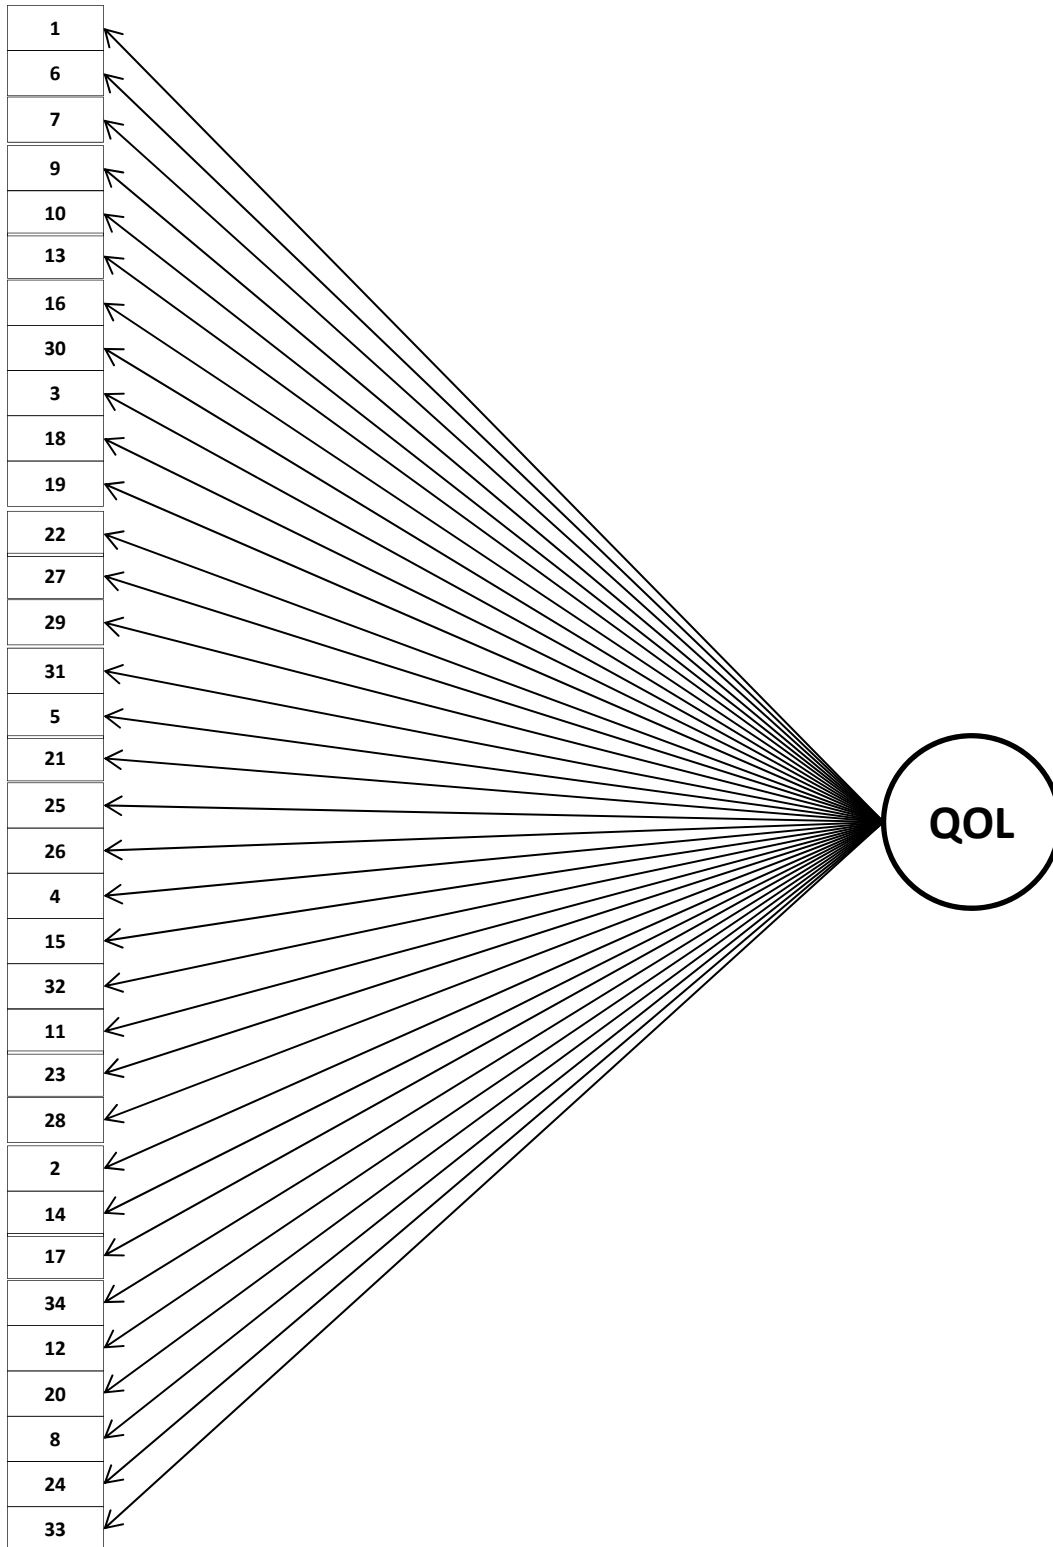

Supplement: MOESM3 [file 9559178]
